# Supplementary material for: The Cdc25 and Ras1 Proteins of Candida albicans Influence Epithelial Toxicity in a Niche-Specific Way
Source: MDPI journal article supplement (doi:10.3390/jof9020201), 2023-02-04
Supplement: s1 [file s1]

**Table S1 Statistical analysis of growth curve data**

The area under the curve of each biological repeat during each condition was measured by making use of the R package Growthcurver [41]. The area under the curve of the different strains were compared and statistically analysed by making use of an ANOVA test with Bonferroni correction. A significant difference was found when  $p \leq 0.05^*$ .

**Table S1.1 Statistical comparison of growth curve data on 100 mM glucose**

| Strain comparison   | Mean difference | Summary         | Adjusted P value |
|---------------------|-----------------|-----------------|------------------|
| WT vs. <i>cdc25</i> | 10.42           | *               | 0.0227           |
| WT vs. <i>ras1</i>  | 18.89           | ***             | 0.0002           |
| WT vs. <i>ras2</i>  | 8.496           | Not significant | 0.0715           |

**Table S1.2 Statistical comparison of growth curve data on 100 mM fructose**

| Strain comparison   | Mean difference | Summary         | Adjusted P value |
|---------------------|-----------------|-----------------|------------------|
| WT vs. <i>cdc25</i> | 8.260           | Not significant | 0.2240           |
| WT vs. <i>ras1</i>  | 14.77           | *               | 0.0107           |
| WT vs. <i>ras2</i>  | 4.025           | Not significant | > 0.9999         |

**Table S1.3 Statistical comparison of growth curve data on 100 mM galactose**

| Strain comparison   | Mean difference | Summary         | Adjusted P value |
|---------------------|-----------------|-----------------|------------------|
| WT vs. <i>cdc25</i> | 12.51           | *               | 0.0266           |
| WT vs. <i>ras1</i>  | 15.74           | **              | 0.0053           |
| WT vs. <i>ras2</i>  | -2.329          | Not significant | > 0.9999         |

**Table S1.4 Statistical comparison of growth curve data on 5 mM glucose**

| Strain comparison   | Mean difference | Summary         | Adjusted P value |
|---------------------|-----------------|-----------------|------------------|
| WT vs. <i>cdc25</i> | 0.8189          | Not significant | > 0.9999         |
| WT vs. <i>ras1</i>  | -1.180          | Not significant | > 0.9999         |
| WT vs. <i>ras2</i>  | 2.500           | Not significant | > 0.9999         |

**Table S1.5 Statistical comparison of growth curve data on RPMI**

| Strain comparison   | Mean difference | Summary         | Adjusted P value |
|---------------------|-----------------|-----------------|------------------|
| WT vs. <i>cdc25</i> | -0.8357         | Not significant | > 0.9999         |
| WT vs. <i>ras1</i>  | -1.163          | Not significant | > 0.9999         |
| WT vs. <i>ras2</i>  | 1.066           | Not significant | > 0.9999         |

### Figure S1 Filamentation experiment

In literature it was shown that a *cdc25* and *ras1* mutant had a defect in morphogenesis on serum containing medium, while a *ras2* mutant did not show abnormal filamentation [14, 16, 18]. As morphogenesis is important during different virulence traits, we confirmed if our strains show the same filamentation phenotype as in literature. Indeed, the phenotype of our mutant strains correlated with the findings in literature (Fig. S1).

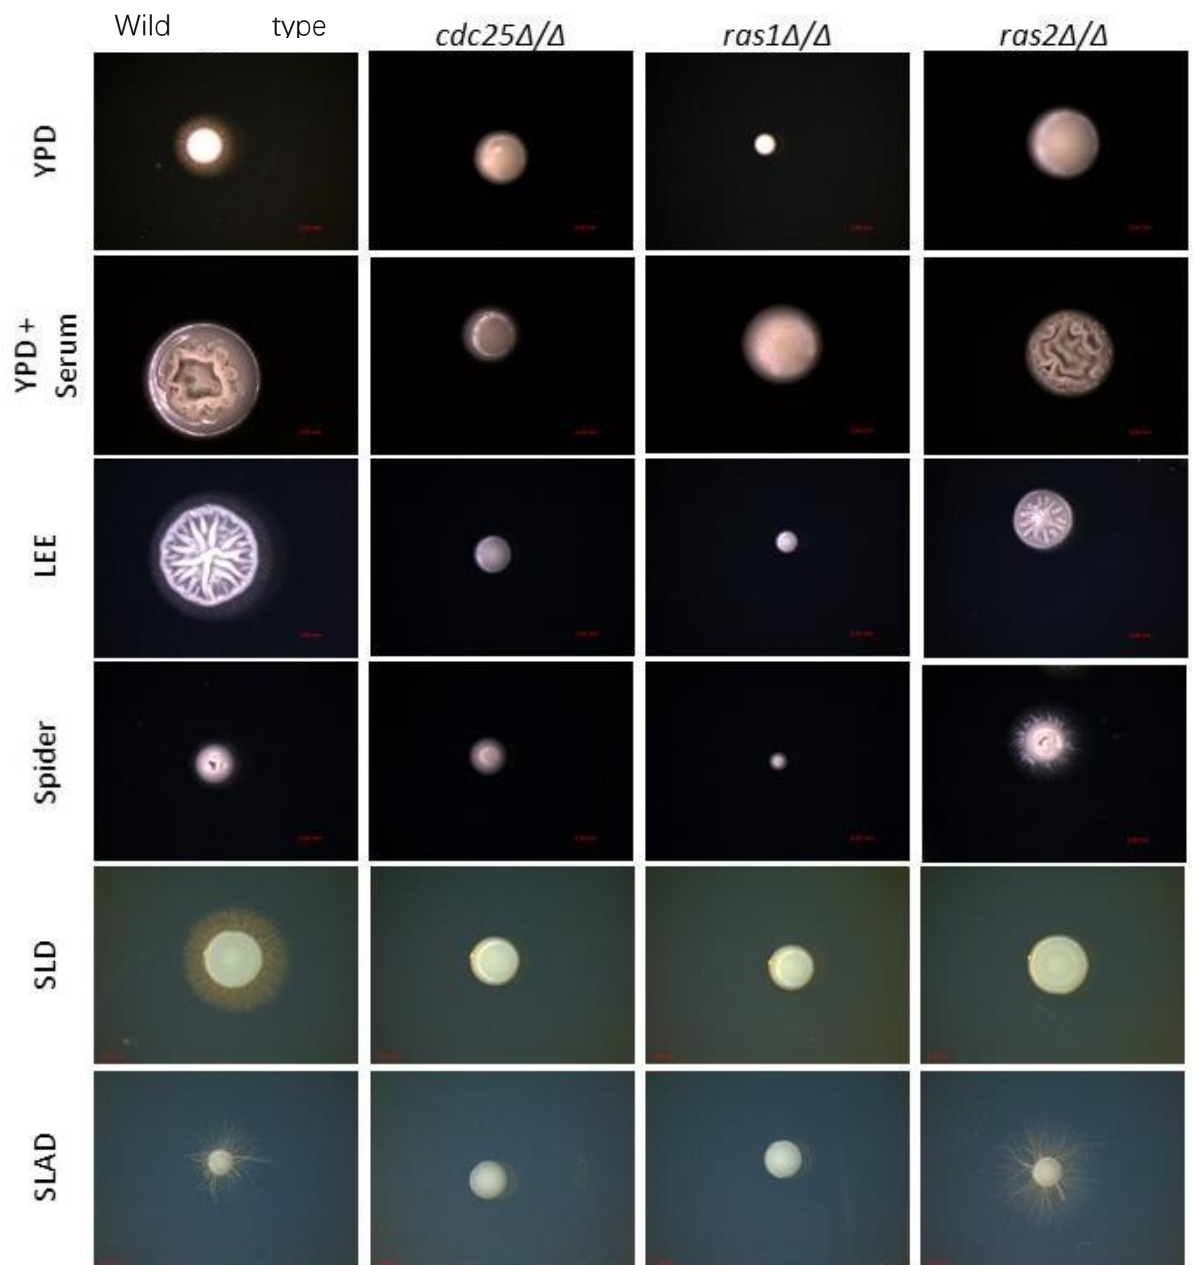

**Figure S1: The *cdc25* and *ras1* mutant have a defective filamentation while the *ras2* mutant shows normal filamentation.** The different strains were tested on different solid hyphal inducing media: YPD, YPD+serum, LEE, Spider, SLD and SLAD.
